# Supplementary material for: 4-Trifluoromethyl bithiazoles as broad-spectrum antimicrobial agents for virus-related bacterial infections or co-infections
Source: Royal Society of Chemistry journal article supplement (doi:10.1039/d3md00686g), 2024-01-01
Supplement: d3md00686g1.pdf [file d3md00686g1.pdf]

## *Supporting Information*

# 4-Trifluormethyl Bithiazoles as Broad-Spectrum Antimicrobial Agents for Virus-Related Bacterial Infections or co-Infections

Francesca Barbieri,<sup>a</sup> Vincent Carlen,<sup>b</sup> Maria Grazia Martina,<sup>a</sup> Filomena Sannio,<sup>c</sup> Sacha Cancade,<sup>c</sup> Cecilia Perini,<sup>d</sup> Margherita Restori,<sup>a</sup> Emmanuele Crespan,<sup>d</sup> Giovanni Maga,<sup>d</sup> Jean-Denis Docquier,<sup>c</sup> Valeria Cagno<sup>b,\*</sup> and Marco Radi<sup>a,\*</sup>

<sup>a</sup> Dipartimento di Scienze degli Alimenti e del Farmaco (DipALIFAR), Università degli Studi di Parma, Viale delle Scienze, 27/A, 43124 Parma, Italy

<sup>b</sup> Institute of Microbiology, University Hospital of Lausanne, University of Lausanne, 1011 Lausanne, Switzerland

<sup>c</sup> Dipartimento di Biotecnologie Mediche, Università degli Studi di Siena, Viale Bracci 16, 53100 Siena, Italy

<sup>d</sup> Institute of Molecular Genetics IGM-CNR "Luigi Luca Cavalli-Sforza", via Abbiategrasso 207, I-27100 Pavia, Italy

## Contents

|                                                                      |        |
|----------------------------------------------------------------------|--------|
| 1. <sup>1</sup> H and <sup>13</sup> C-NMR spectra of final compounds | S2-S12 |
| 2. <sup>19</sup> F NMR of compound <b>8j</b>                         | S13    |
| 3. <b>Figure S1.</b> Sequencing of the hRVA16 3C protease            | S14    |
| 4. <b>Table S1.</b> Elemental analysis of final compounds            | S15    |

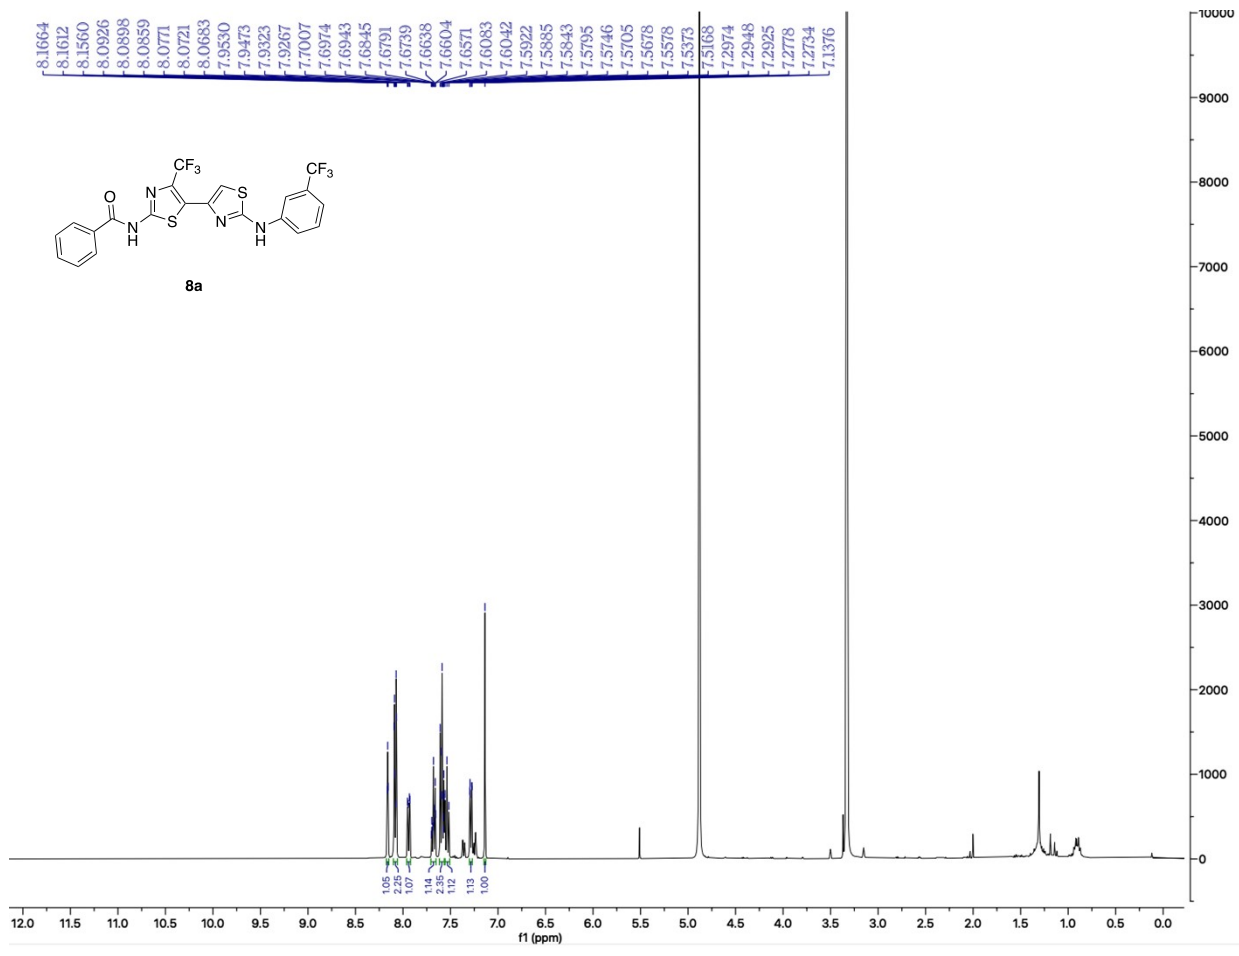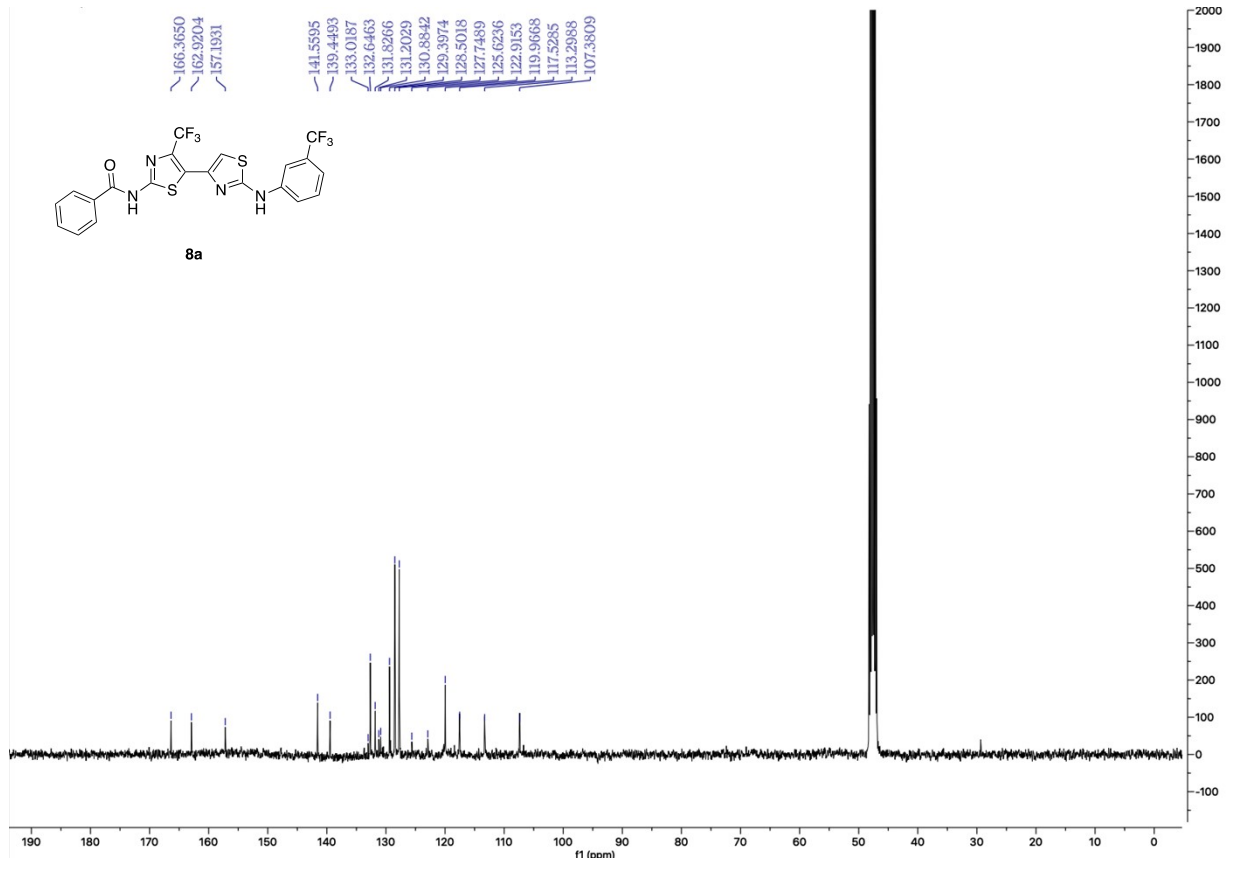

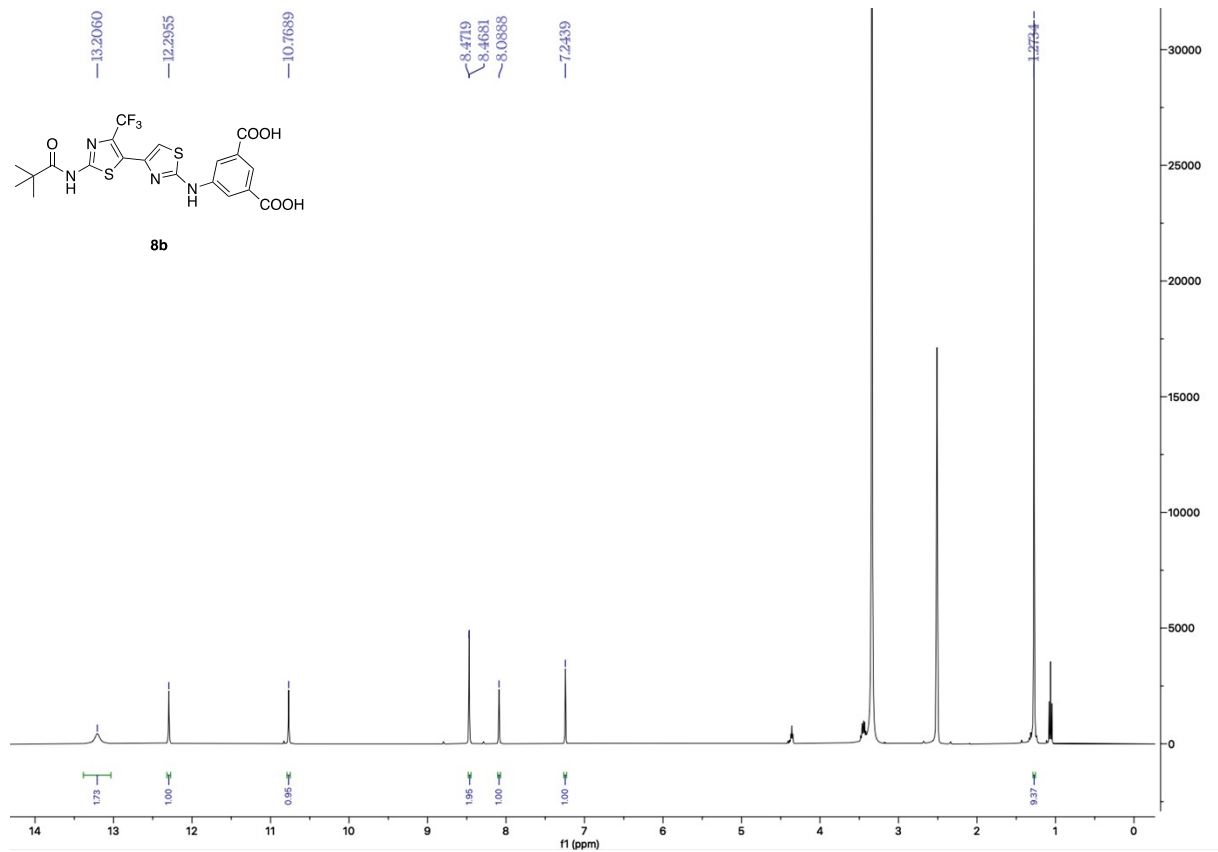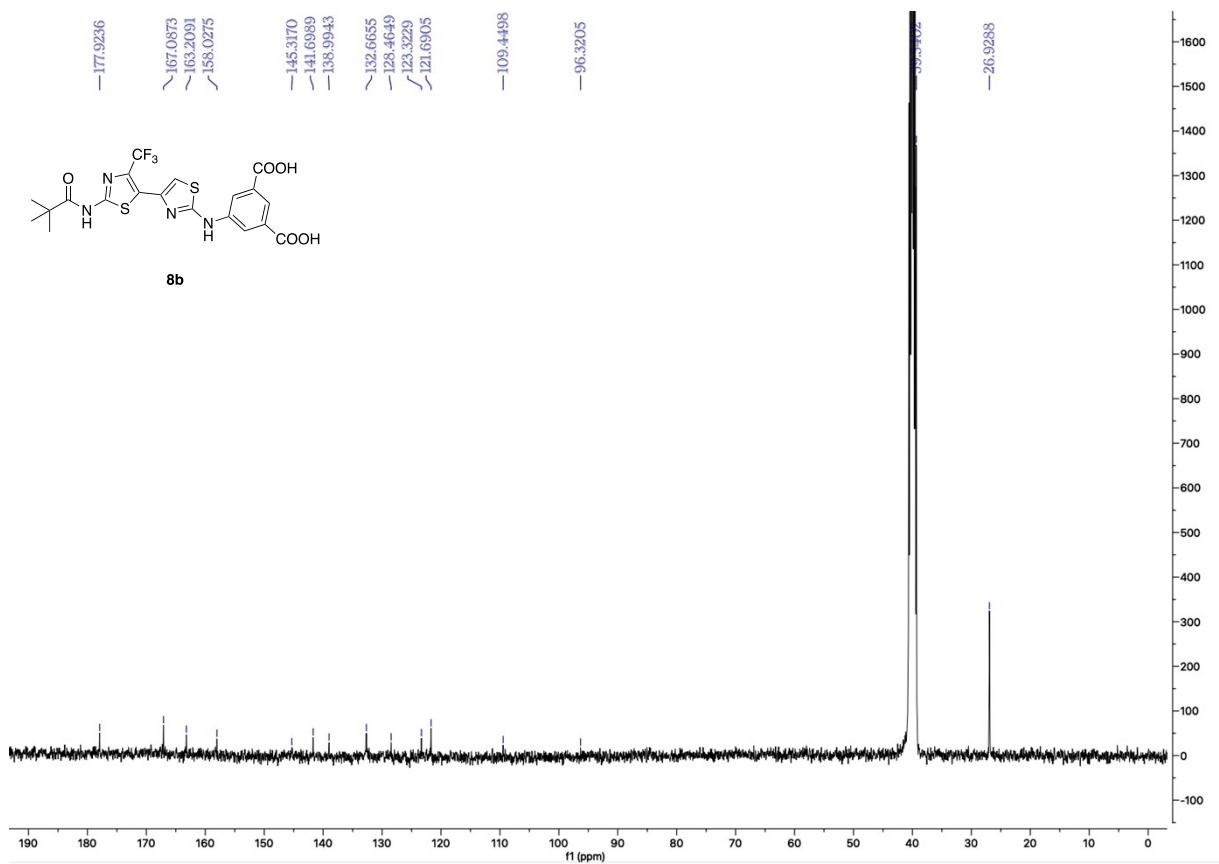

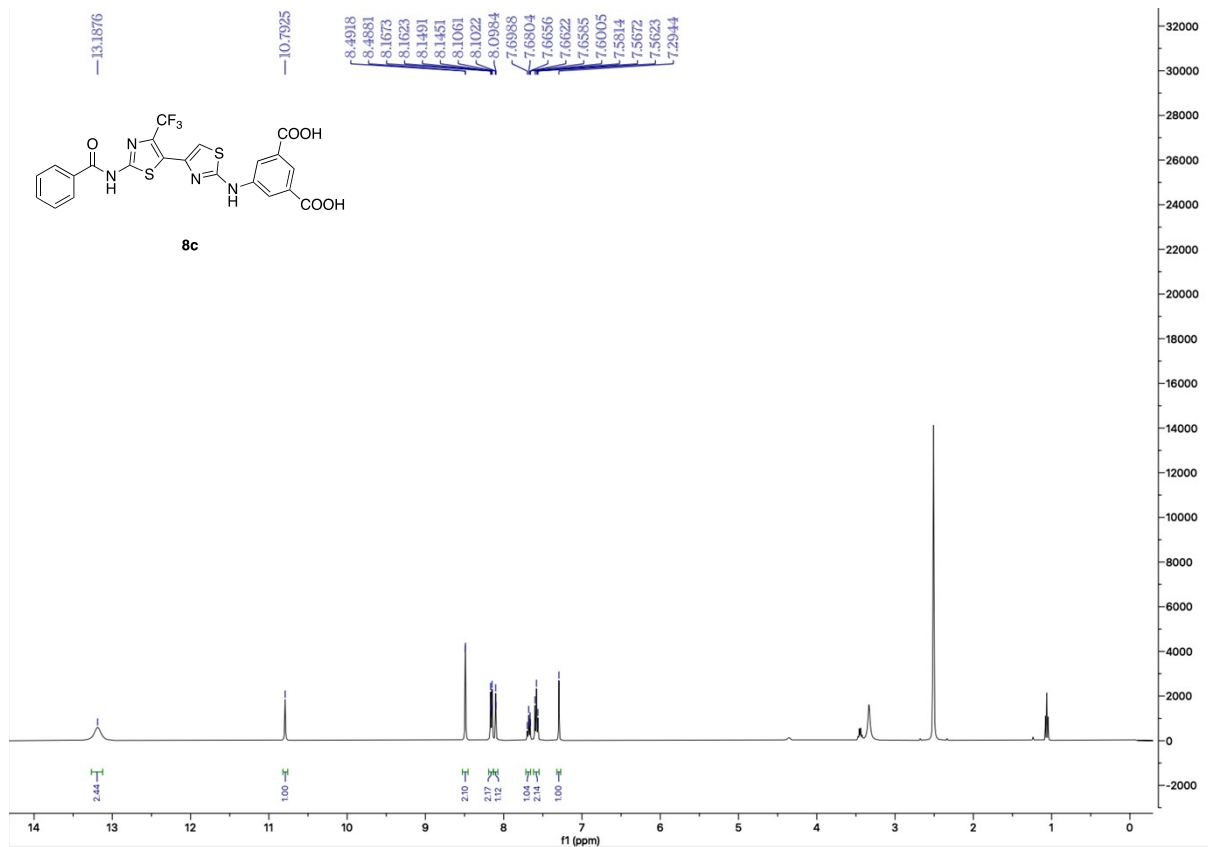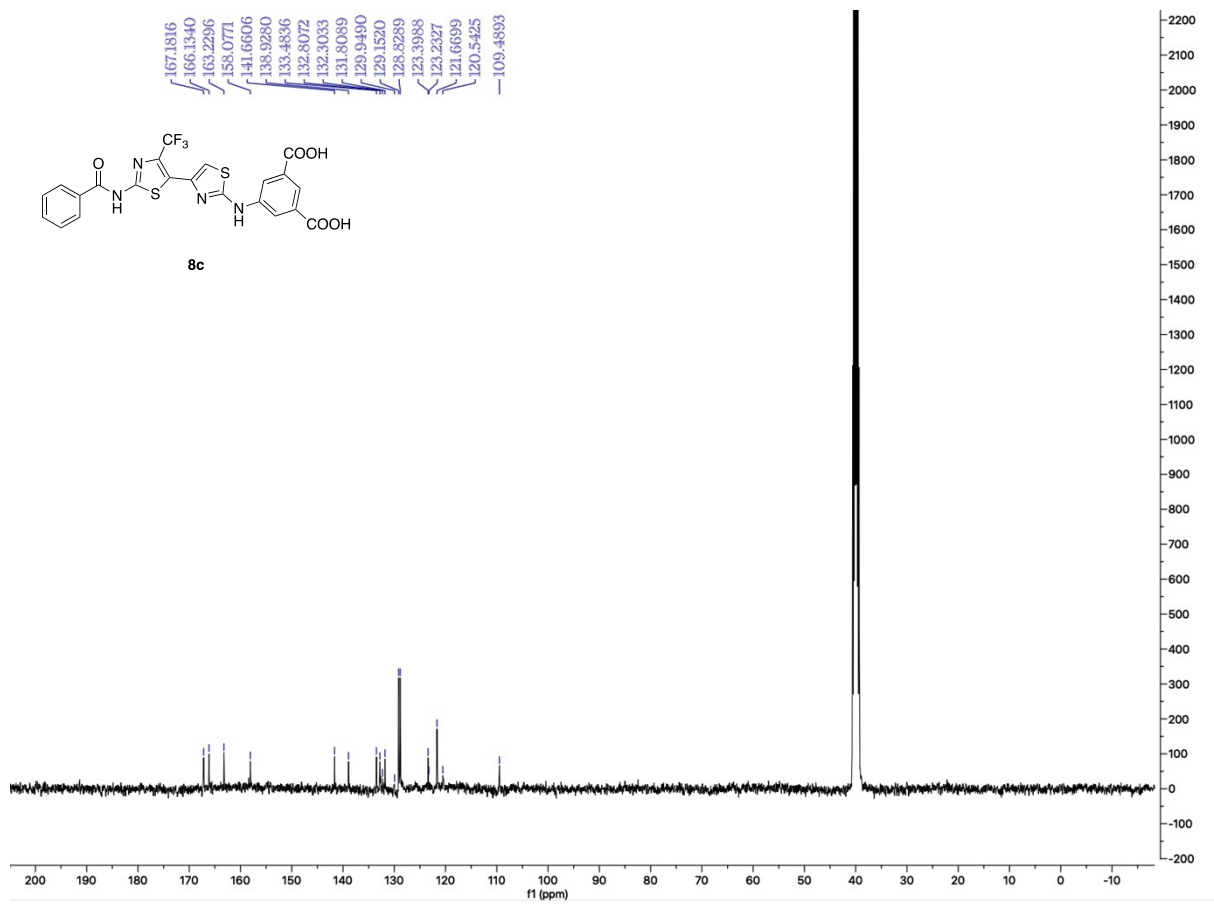

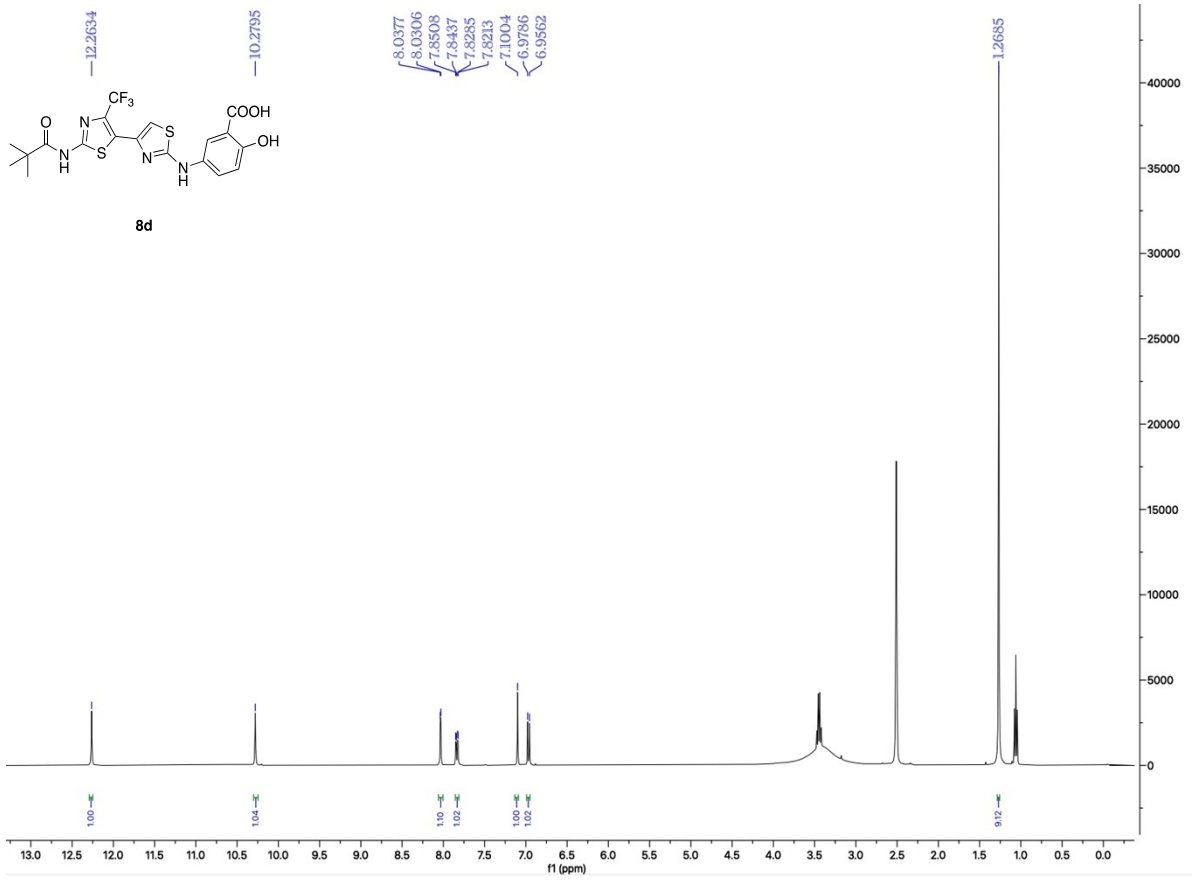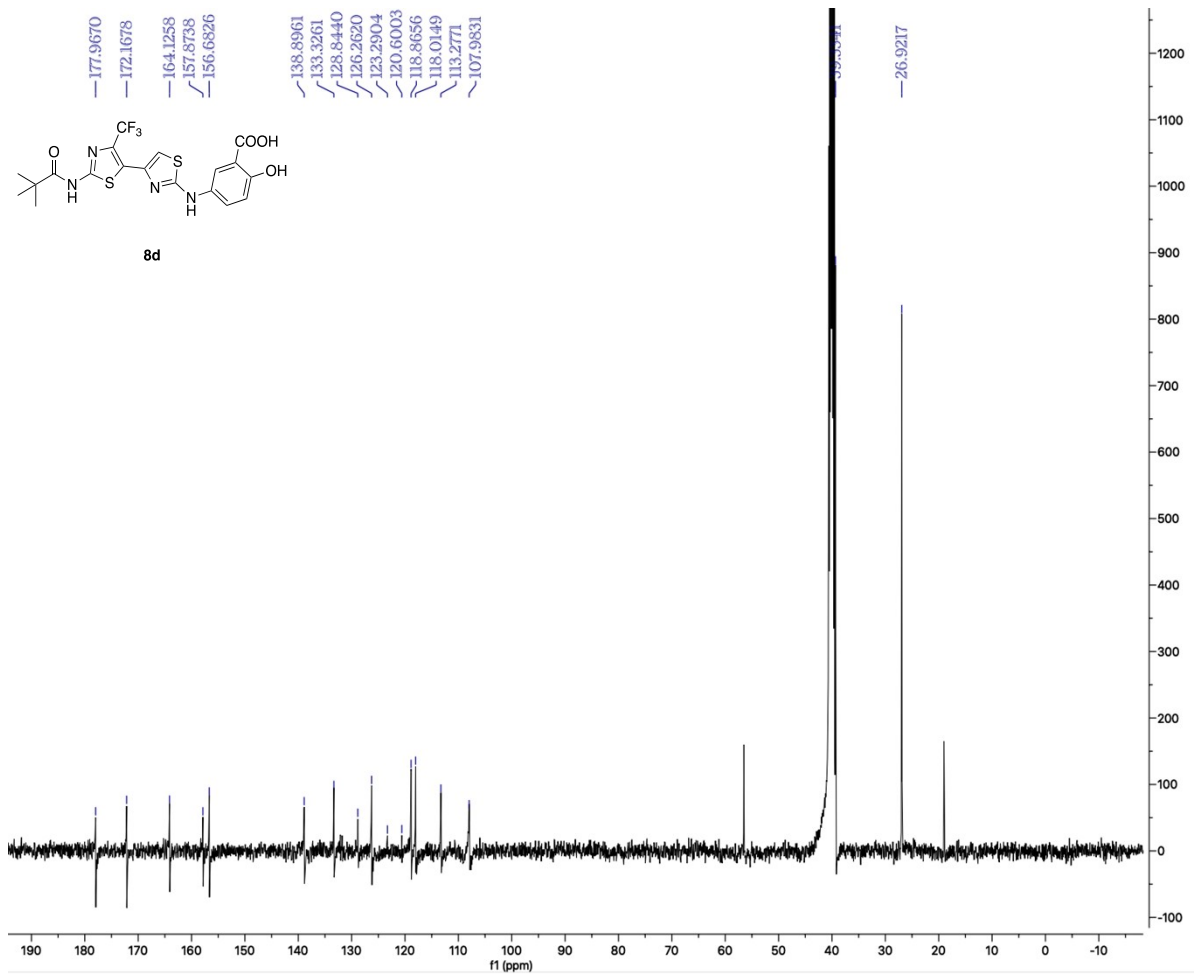

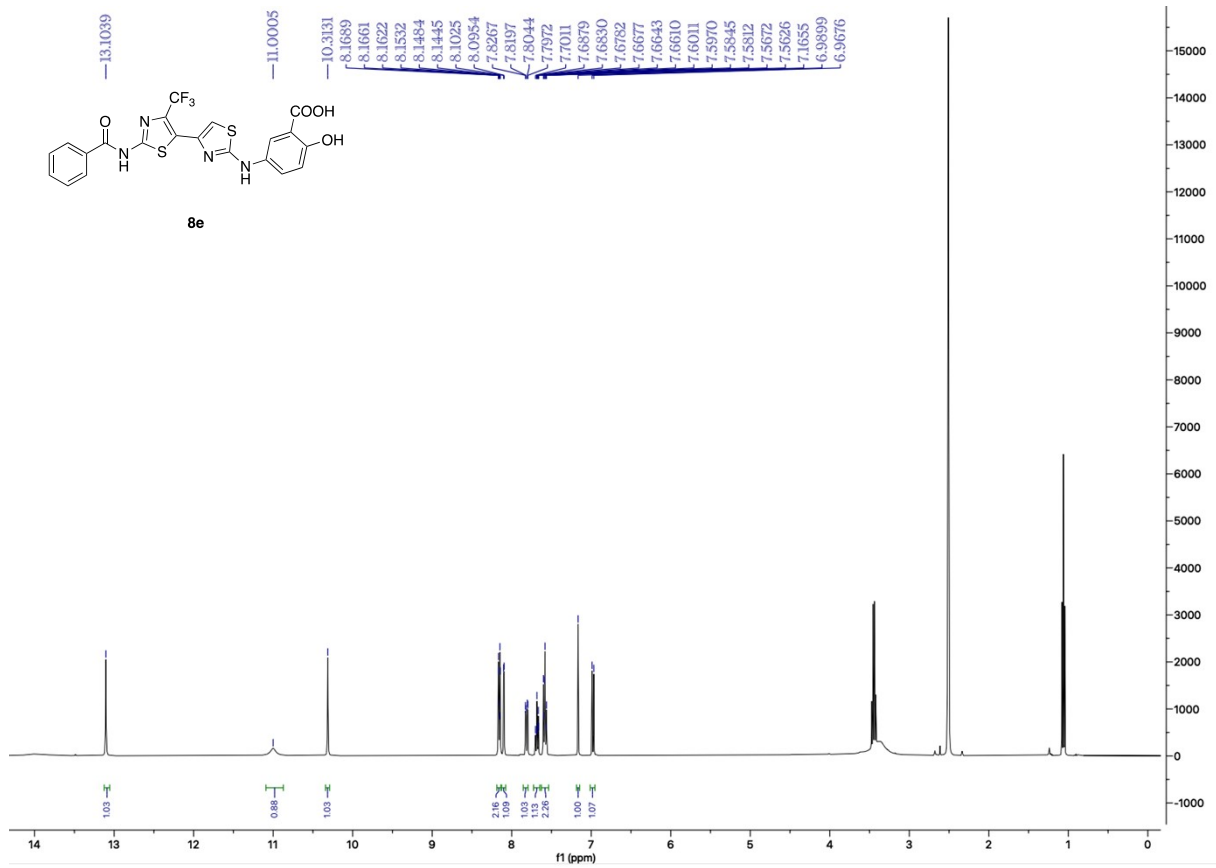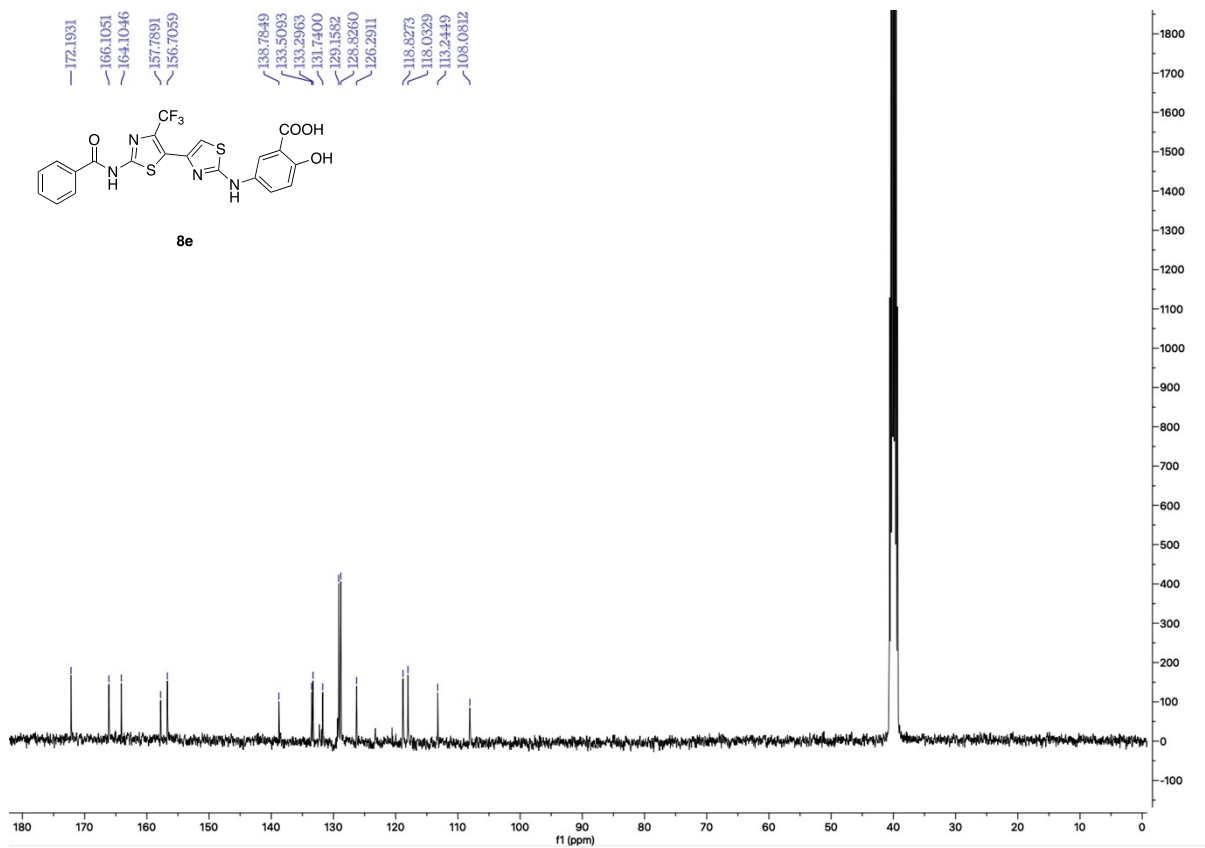

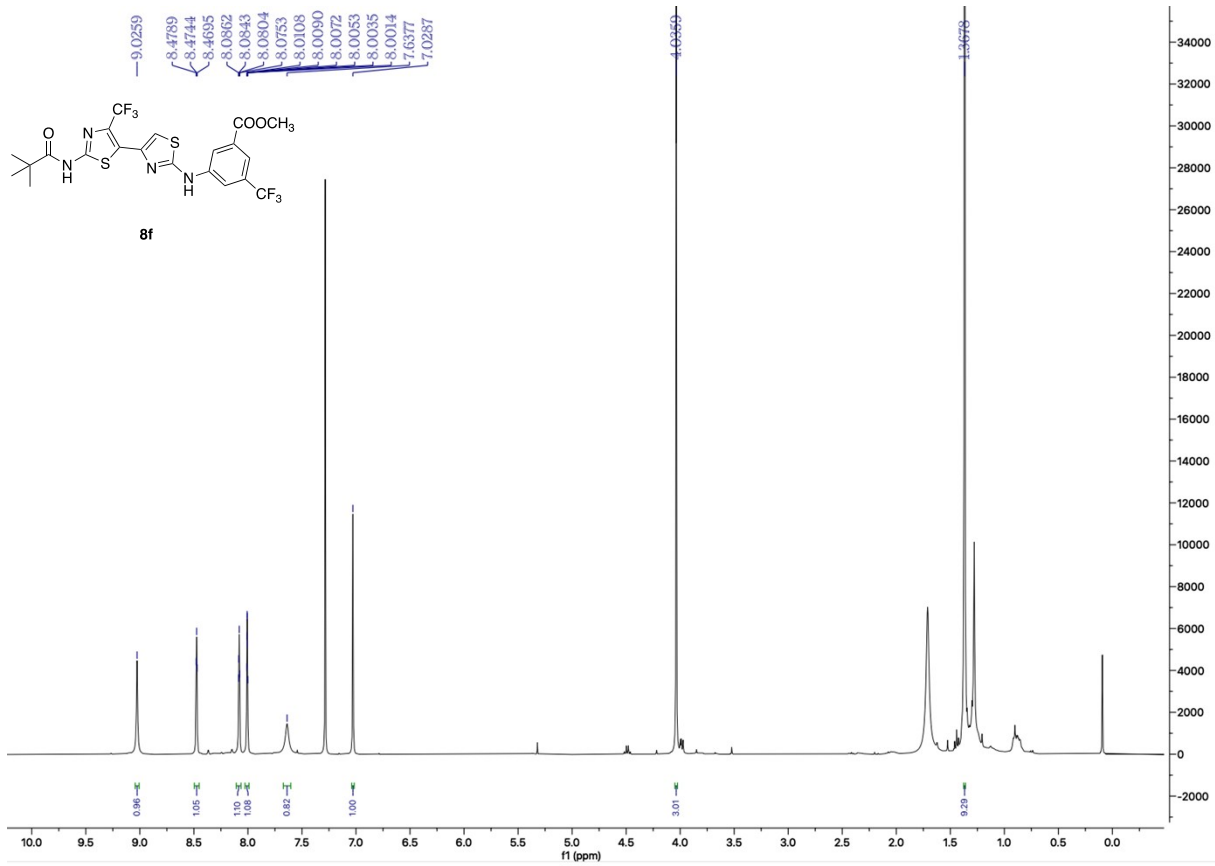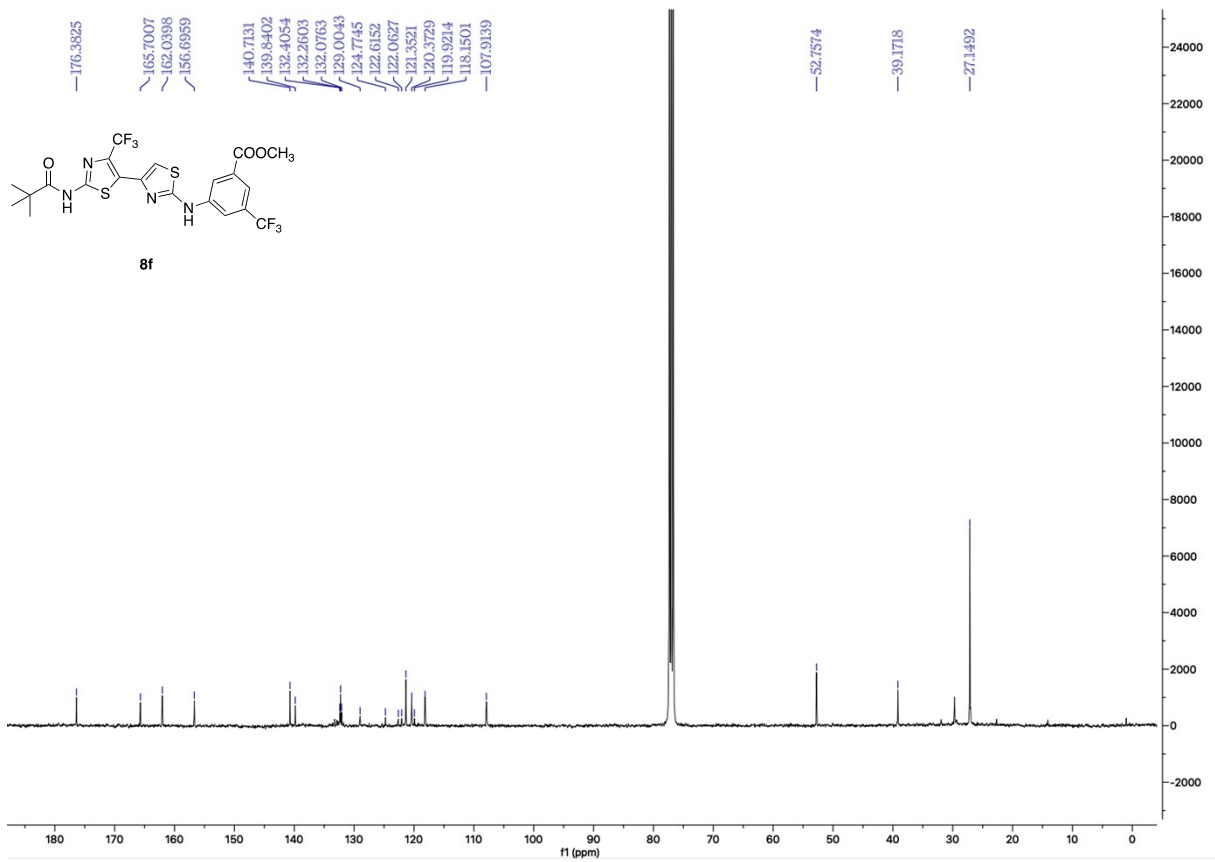

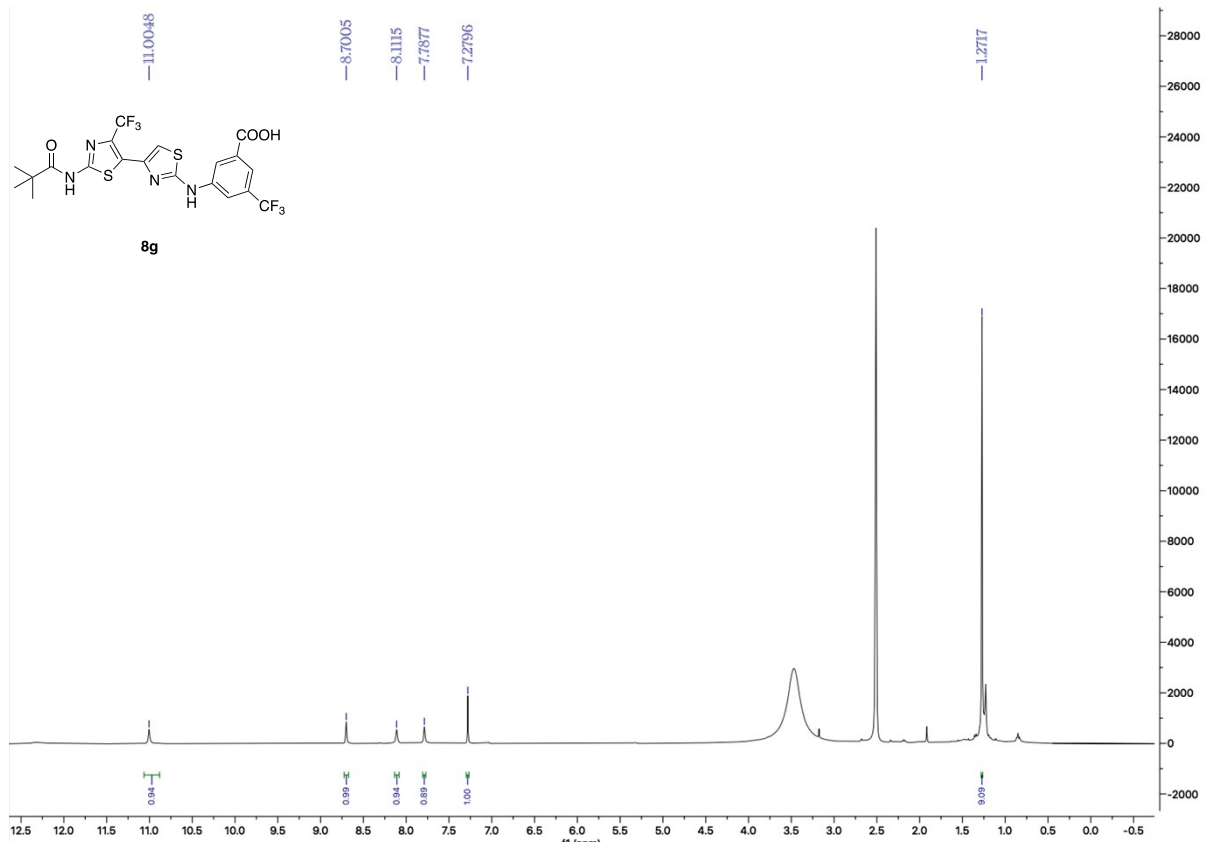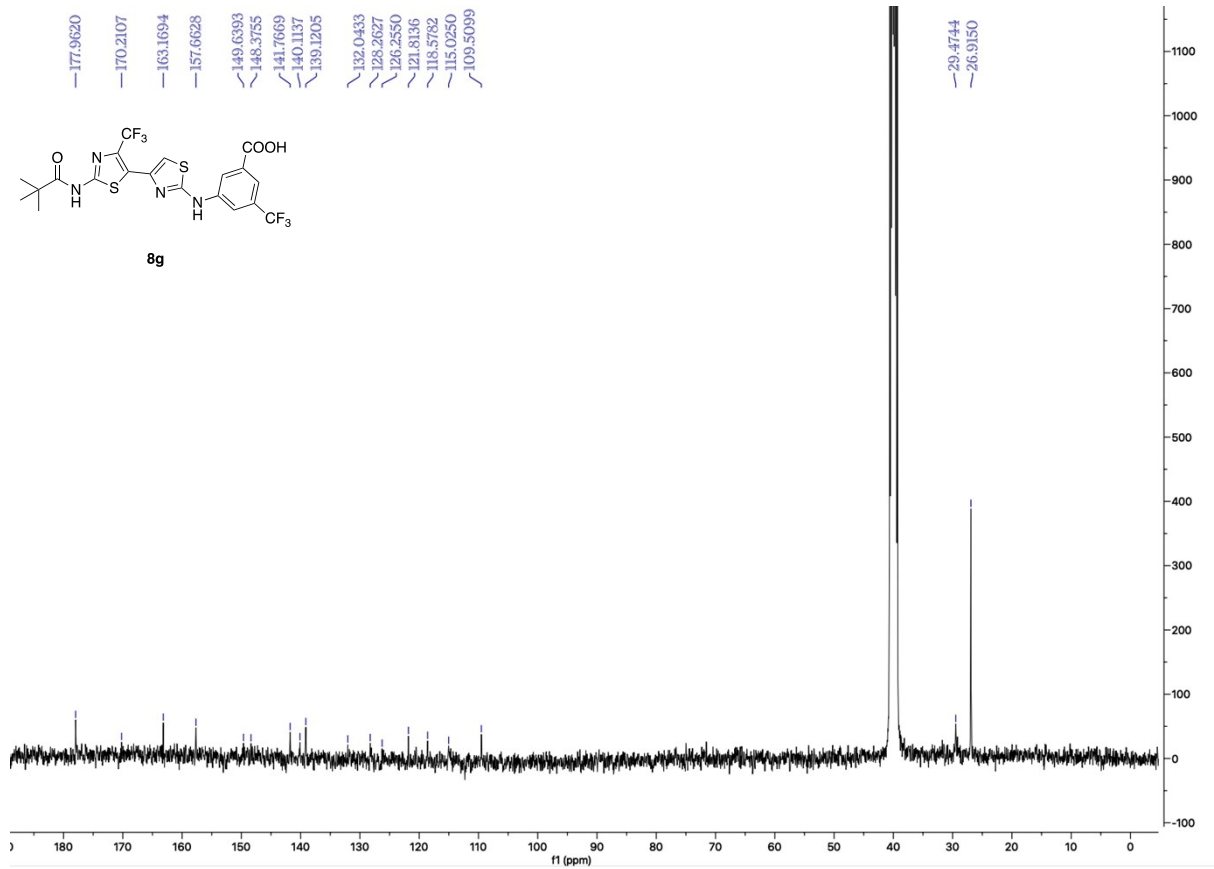



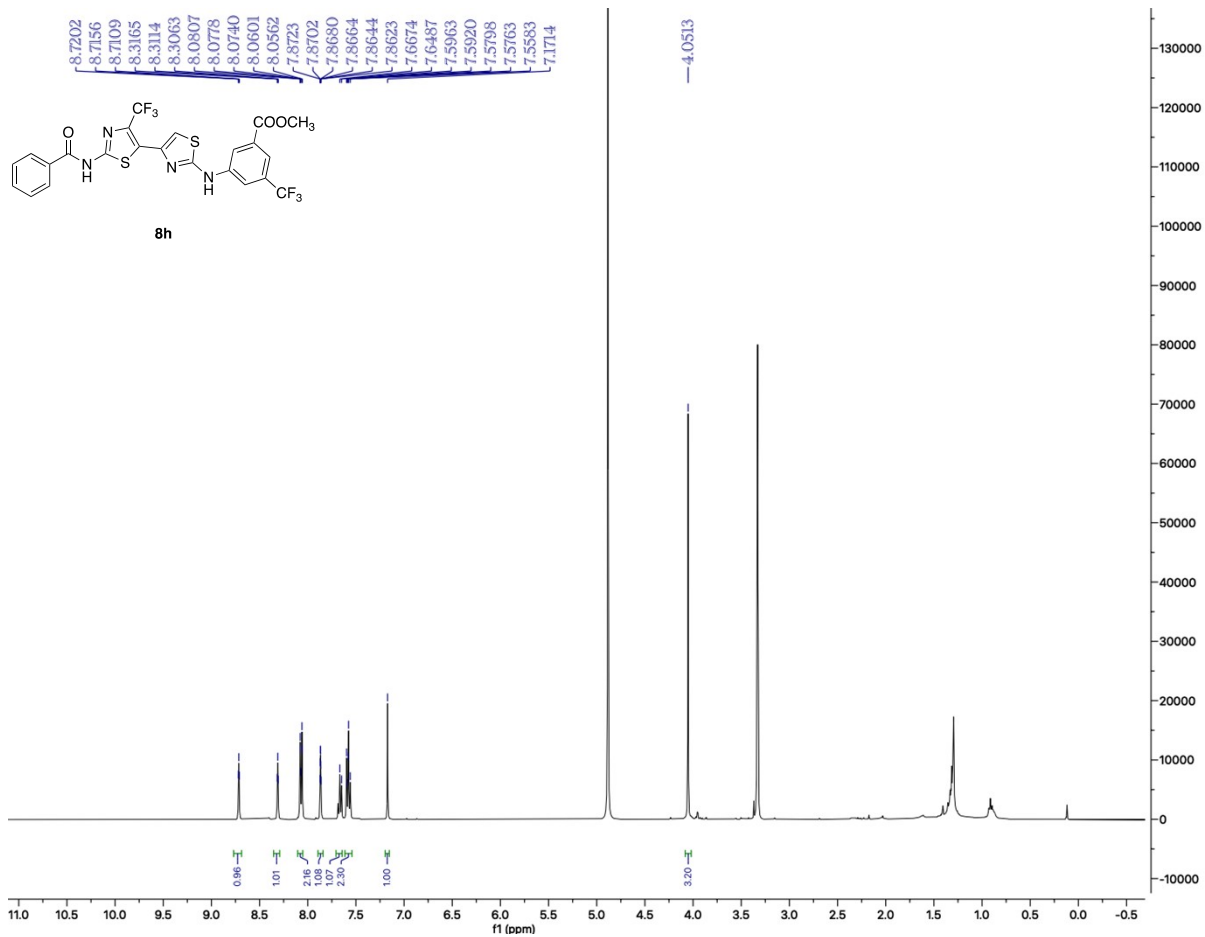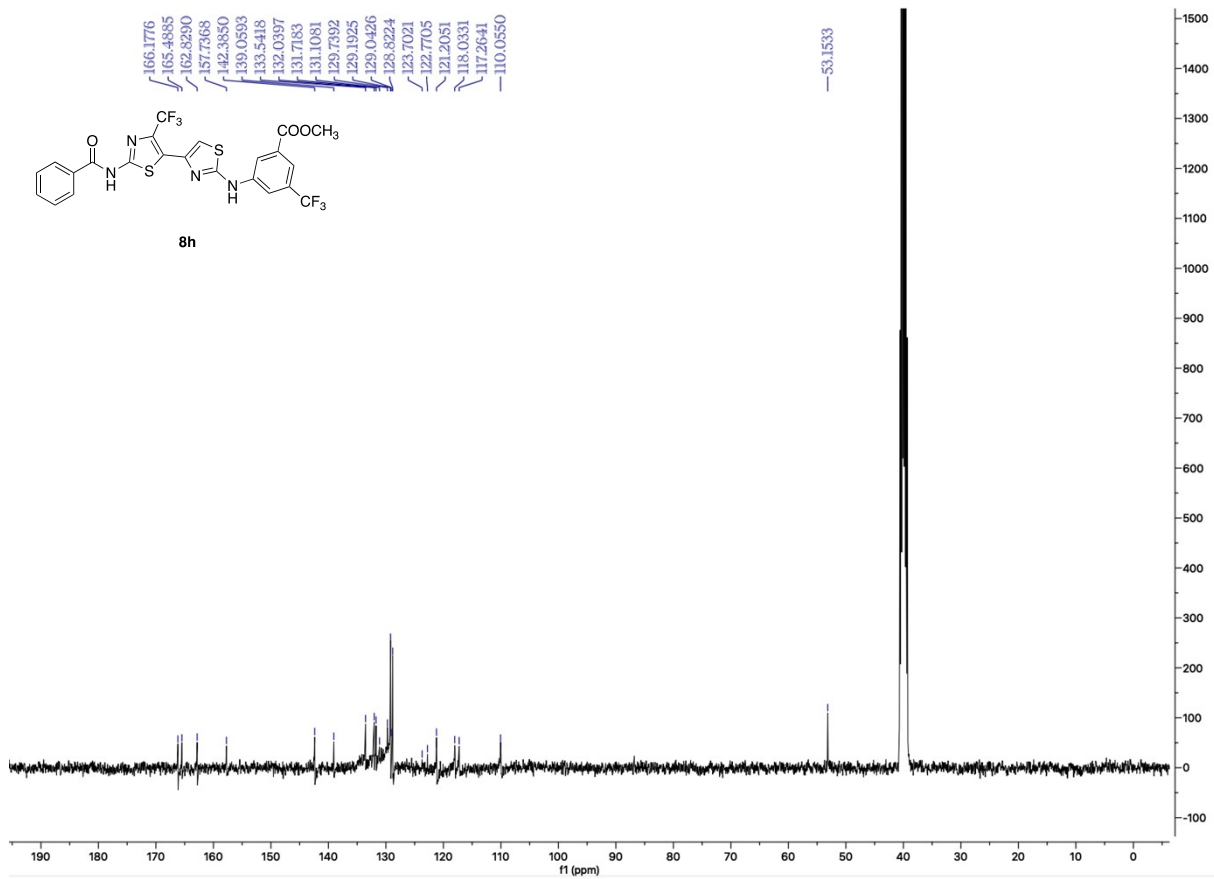

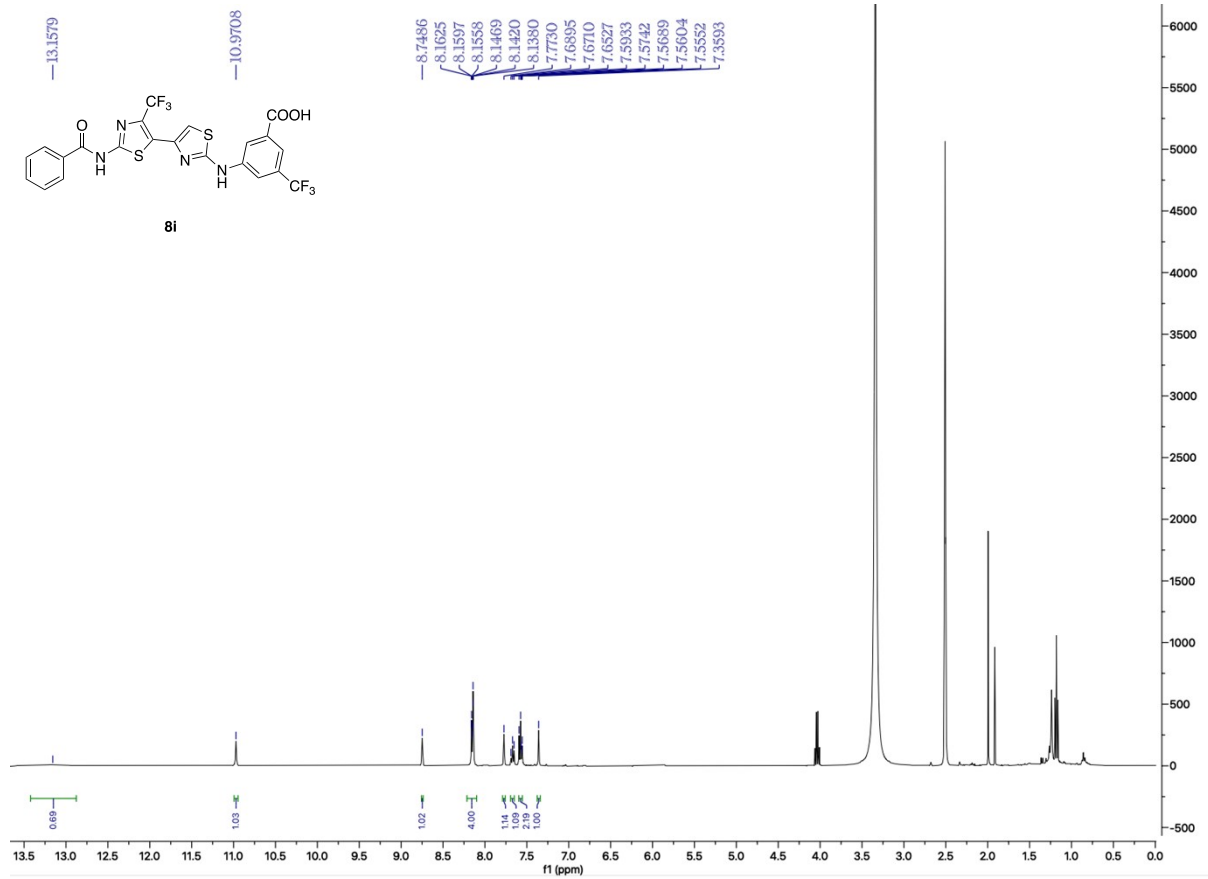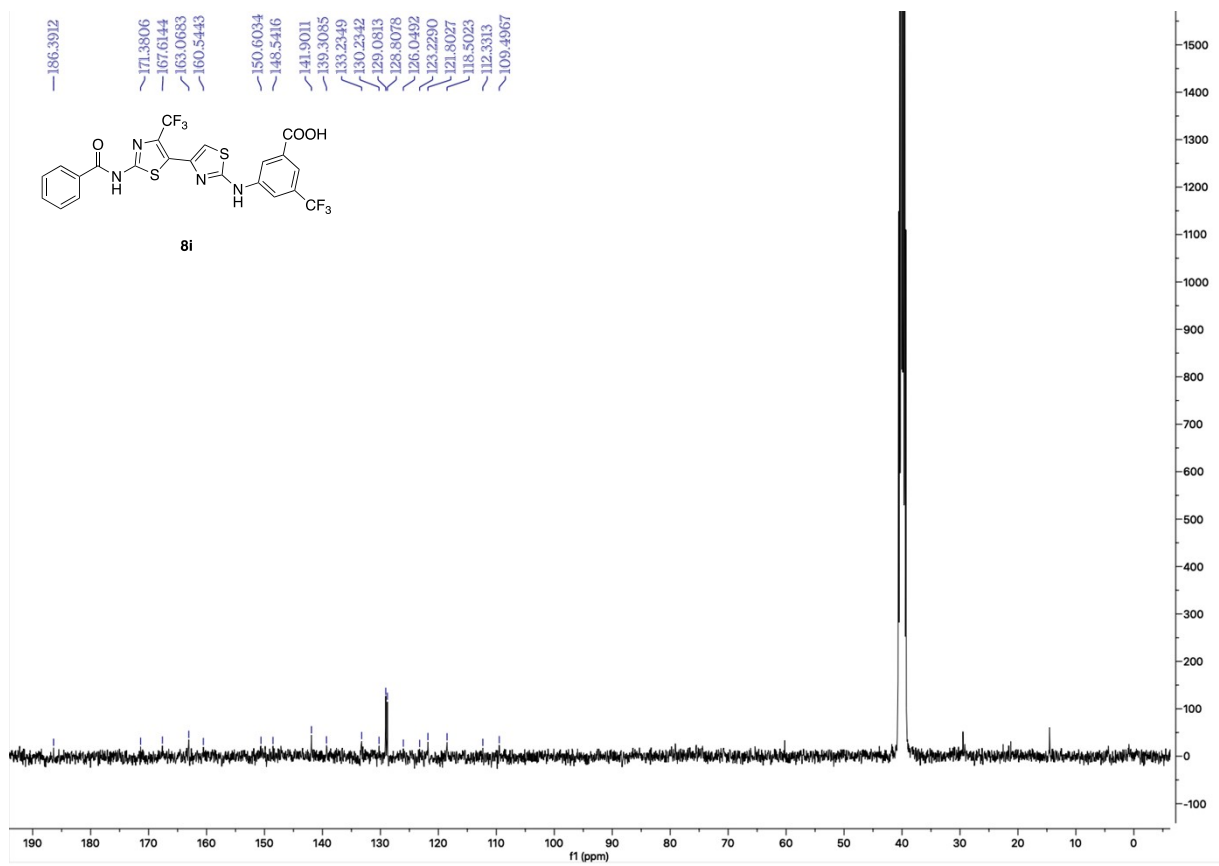

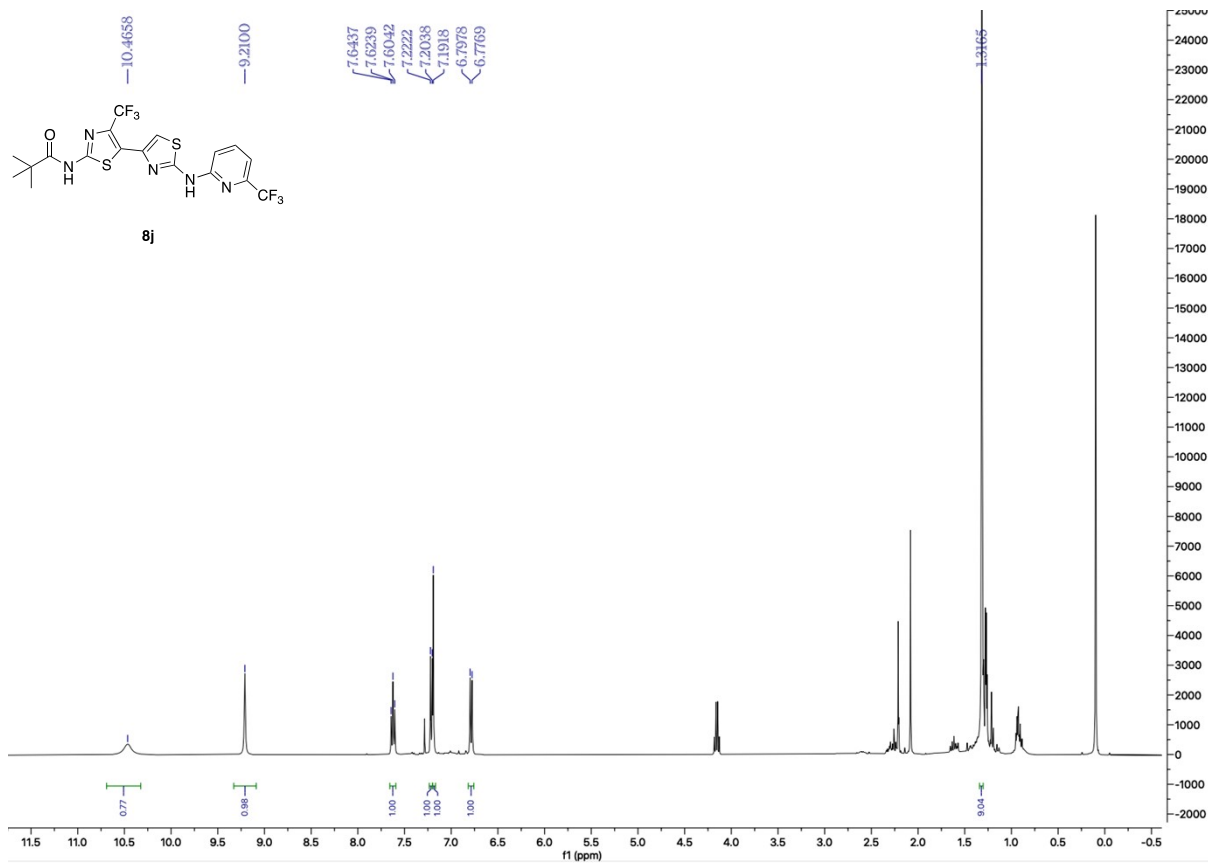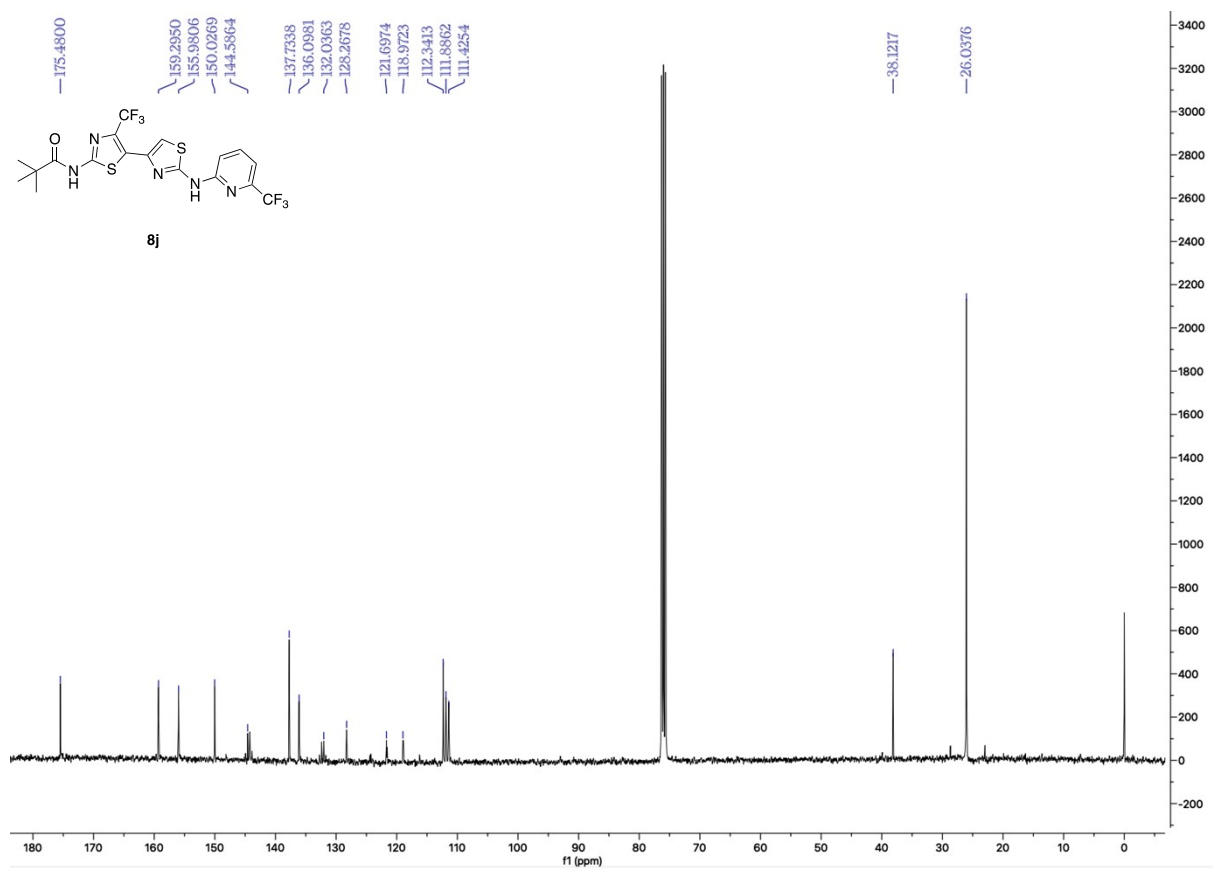

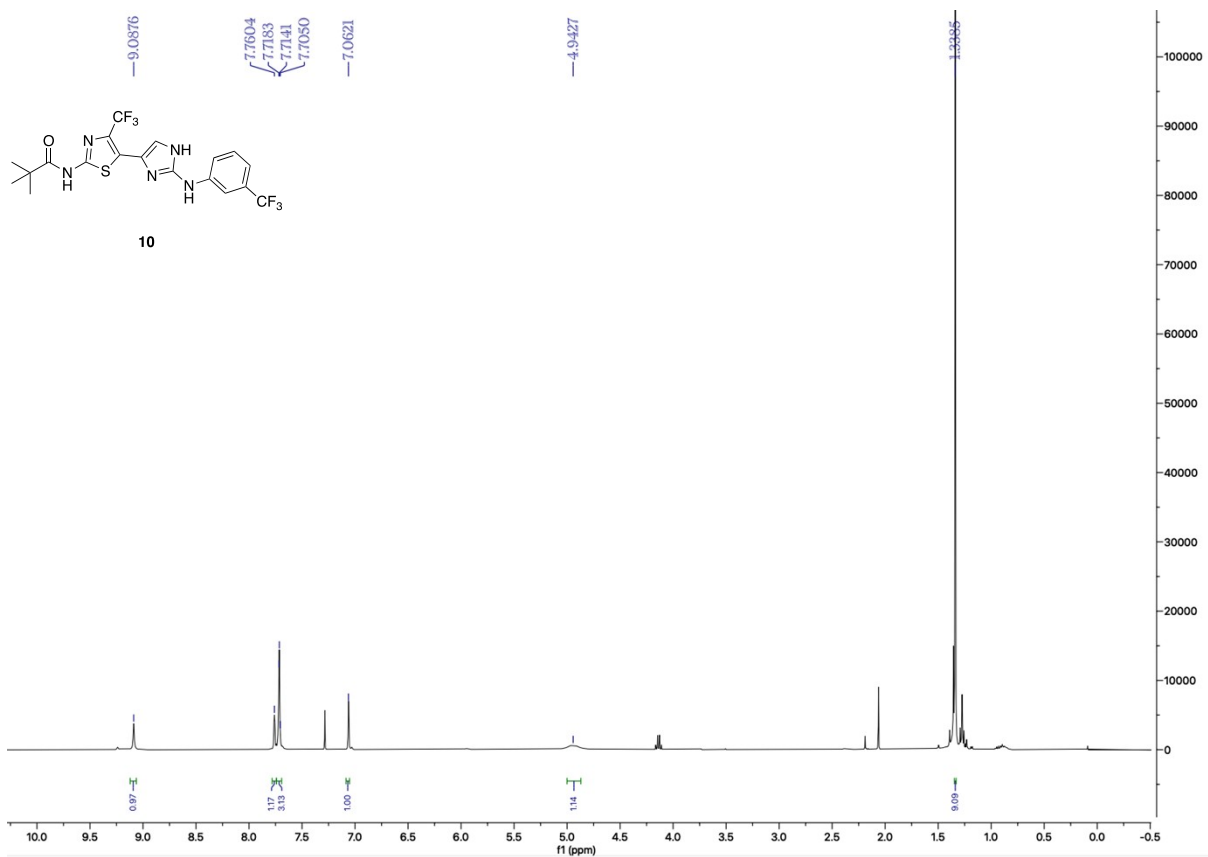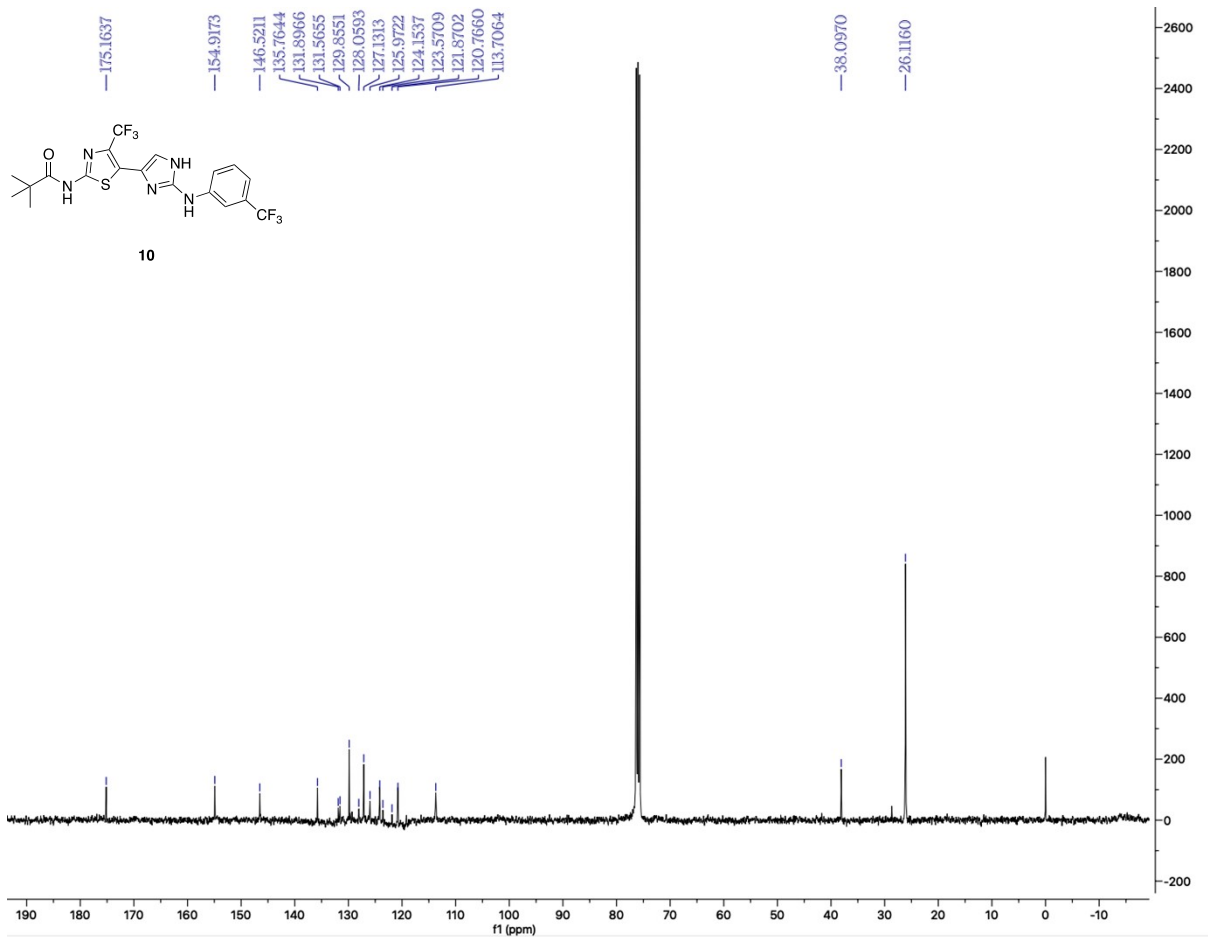

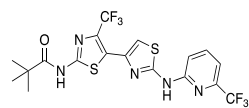

8j

— 60.4715  
— 68.2583

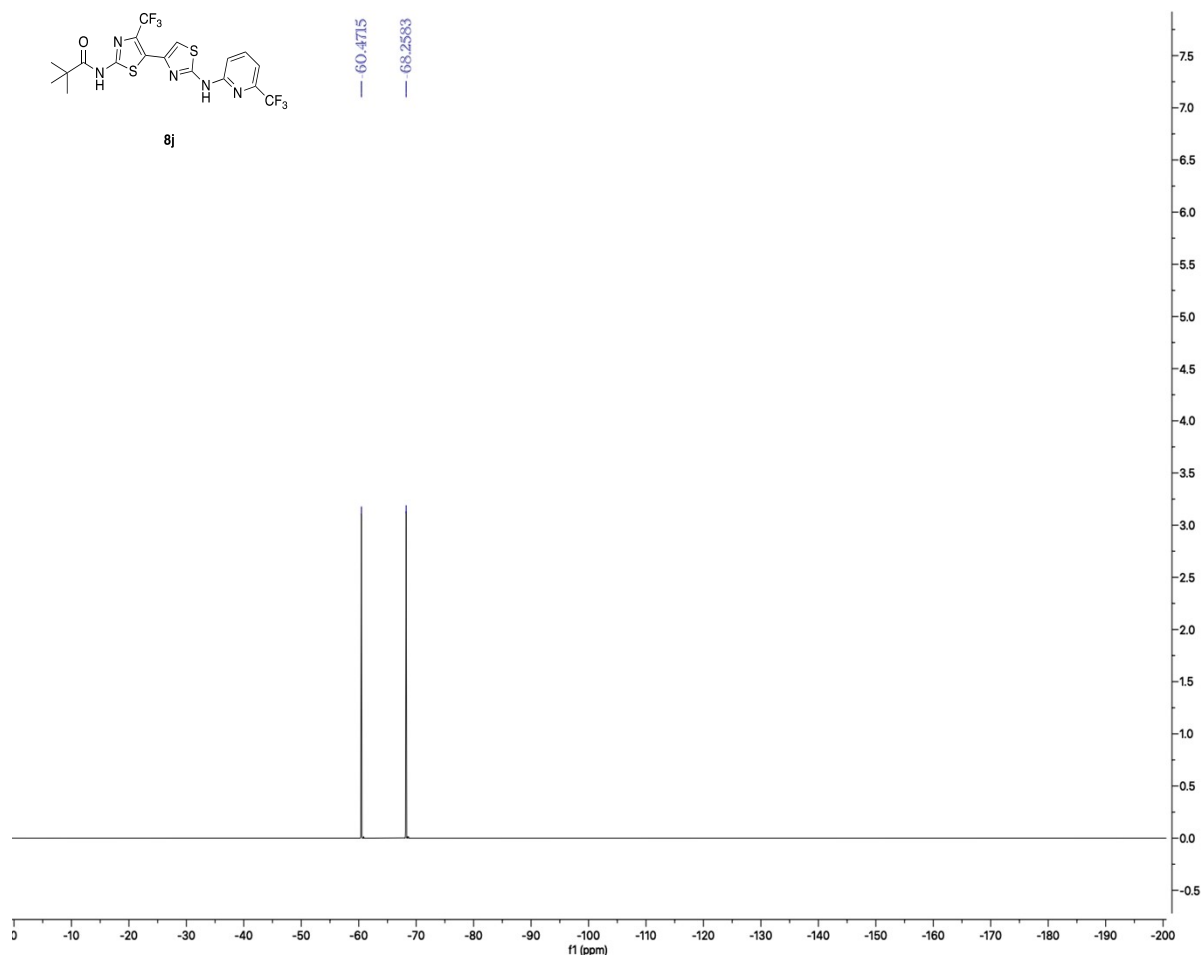

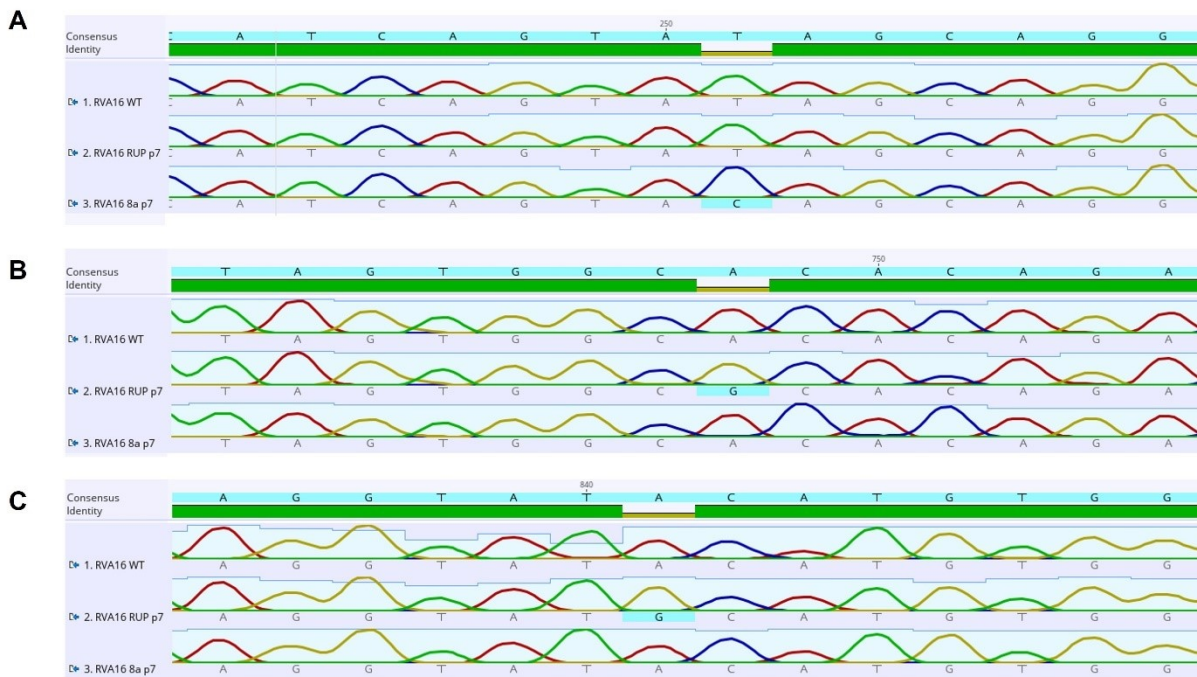

**Figure S1.** Results of sanger sequencing of the RVA16 passaged in absence of drugs (RVA16 WT), in presence of rupintrivir (RVA16 RUP p7), or in presence of **8a** (RVA16 8a p7). The sequence corresponds to the fragment 4809-5768 of the reference sequence NC\_038311 A) Mutation C/T in RVA16 **8a** p7 resulting in I61T of protein 3A. B) Mutation G/A in RVA16 RUP p7 resulting in T130A of protein 3C. C) Mutation G/A in RVA16 RUP p7 resulting in I60M of protein 3C.

**Table S1.** Elemental analysis of final compounds

| <b>Compd.</b> | <b>Elemental analysis (%)</b> |      |       |              |      |       |
|---------------|-------------------------------|------|-------|--------------|------|-------|
|               | <b>Calculated</b>             |      |       | <b>Found</b> |      |       |
|               | C                             | H    | N     | C            | H    | N     |
| <b>8a</b>     | 49.03                         | 2.35 | 10.89 | 49.25        | 2.57 | 10.99 |
| <b>8b</b>     | 46.69                         | 3.33 | 10.89 | 46.81        | 3.58 | 10.79 |
| <b>8c</b>     | 49.44                         | 2.45 | 10.48 | 49.33        | 2.65 | 10.40 |
| <b>8d</b>     | 46.91                         | 3.52 | 11.52 | 46.99        | 3.63 | 11.68 |
| <b>8e</b>     | 49.80                         | 2.59 | 11.06 | 49.94        | 2.75 | 11.23 |
| <b>8f</b>     | 45.65                         | 3.28 | 10.14 | 45.55        | 3.19 | 10.02 |
| <b>8g</b>     | 44.61                         | 2.99 | 10.40 | 44.84        | 3.15 | 10.52 |
| <b>8h</b>     | 48.25                         | 2.46 | 9.79  | 48.29        | 2.62 | 9.69  |
| <b>8i</b>     | 47.31                         | 2.17 | 10.03 | 47.44        | 2.31 | 10.26 |
| <b>8j</b>     | 43.63                         | 3.05 | 14.13 | 43.83        | 3.18 | 14.31 |
| <b>10</b>     | 47.80                         | 3.59 | 14.67 | 47.88        | 3.76 | 14.79 |
